# Supplementary material for: Evaluating the Impacts of Environmental and Anthropogenic Factors on Water Quality in the Bumbu River Watershed, Papua New Guinea
Source: MDPI journal article supplement (doi:10.3390/w15030489), 2023-01-26
Supplement: s1 [file s1]

## Supplementary materials

**Table S1.** Selected Guideline Values for CCME WQI Calculation

| Sample ID            | Unit                      | Upper Limit | Guideline Source                       |
|----------------------|---------------------------|-------------|----------------------------------------|
| pH                   |                           | 8.5         | World Health Organization [25]         |
| Hardness calculation | mg/L as CaCO <sub>3</sub> | 200         | Office of Legislative Counsel-PNG [24] |
| Total alkalinity     | mg/L as CaCO <sub>3</sub> | 200         | Bureau of Indian Standards [26]        |
| TDS                  | mg/L                      | 500         | Office of Legislative Counsel-PNG [24] |
| Turbidity            | N.T.U.                    | 5           | Bureau of Indian Standards [26]        |
| Conductivity         | µS/cm                     | 400         | World Health Organization [25]         |
| <i>E. coli</i>       | colonies/100 ml           | 1           | Office of Legislative Counsel-PNG [24] |
| Calcium              | mg/L                      | 75          | Bureau of Indian Standards [26]        |
| Iron                 | mg/L                      | 0.1         | Office of Legislative Counsel-PNG [24] |
| Manganese            | mg/L                      | 0.05        | Office of Legislative Counsel-PNG [24] |
| Mercury              | mg/L                      | 0.001       | Bureau of Indian Standards [26]        |

**Table S2.** WQ guidelines, raw WQ data and comparison of results from spreadsheet WQI calculator vs CCME WQI calculator. UA series.

| Sample ID            | Unit                      | Guideline value | Guideline value flag | UA1      | UA2      | UA3      | UA4      | UA5      | UA6      | UA7      | UA8      |
|----------------------|---------------------------|-----------------|----------------------|----------|----------|----------|----------|----------|----------|----------|----------|
| pH                   |                           | 8.5             | 1                    | 8.3      | 8.24     | 8.31     | 8.2      | 8.2      | 8.1      | 8.2      | 8.1      |
| Hardness calculation | mg/L as CaCO <sub>3</sub> | 200             | 1                    | 155      | 152      | 158      | 1489     | 135      | 199      | 303      | 993      |
| Ca hardness          | mg/L                      |                 | 0                    | 140      | 139      | 121      | 1400     | 94       | 158      | 255      | 916      |
| Mg hardness          | mg/L                      |                 | 0                    | 15       | 13       | 37       | 89       | 41       | 41       | 48       | 77       |
| Total alkalinity     | mg/L as CaCO <sub>3</sub> | 200             | 1                    | 388      | 424      | 700      | 140      | 150      | 160      | 180      | 170      |
| TDS                  | mg/L                      | 500             | 1                    | 129      | 165      | 151      | 1300     | 1000     | 740      | 1700     | 1100     |
| Turbidity            | N.T.U.                    | 5               | 1                    | 14       | 16       | 12       | 18       | 16       | 18       | 17       | 14       |
| Temperature          | °C                        |                 | 0                    | 28.2     | 28.7     | 31.1     | 31.27    | 31.5     | 31.6     | 31.33    | 31.23    |
| Conductivity         | µS/cm                     | 400             | 1                    | 266      | 243      | 315      | 374      | 412      | 410      | 422      | 439      |
| <i>E. coli</i>       | colonies/100 ml           | 1               | 1                    | 40       | 150      | 1800     | 5400     | 4100     | 4300     | 5400     | 7000     |
| Calcium              | mg/L                      | 75              | 1                    | 53       | 51       | 36       | 580      | 38       | 63       | 102      | 367      |
| Iron                 | mg/L                      | 0.1             | 1                    | 0.2196   | 0.00245  | 0.0049   | 0.14     | 0.17     | 0.15     | 0.14     | 0.25     |
| Manganese            | mg/L                      | 0.05            | 1                    | 0.0349   | 0.0335   | 0.0331   | 0.019    | 0.041    | 0.041    | 0.024    | 0.02     |
| Mercury              | mg/L                      | 0.001           | 1                    | 0.001    | 0.001    | 0.001    | 0.001    | 0.001    | 0.001    | 0.001    | 0.001    |
| Number of guidelines |                           |                 | 11                   |          |          |          |          |          |          |          |          |
| <b>FAILED</b>        |                           |                 |                      | <b>4</b> | <b>3</b> | <b>3</b> | <b>6</b> | <b>5</b> | <b>5</b> | <b>7</b> | <b>7</b> |
| F1                   |                           |                 |                      | 36.3636  | 27.2727  | 27.2727  | 54.5454  | 45.4545  | 45.4545  | 63.6363  | 63.6363  |
| F2                   |                           |                 |                      | 36.3636  | 27.2727  | 27.2727  | 54.5454  | 45.4545  | 45.4545  | 63.6363  | 63.6363  |
|                      |                           |                 |                      | 0        | 0        | 0        | 6.445    | 0        | 0        | 0.515    | 3.965    |
|                      |                           |                 |                      | 0.94     | 1.12     | 2.5      | 0        | 0        | 0        | 0        | 0        |
|                      |                           |                 |                      | 0        | 0        | 0        | 1.6      | 1        | 0.48     | 2.4      | 1.2      |
|                      |                           |                 |                      | 1.8      | 2.2      | 1.4      | 2.6      | 2.2      | 2.6      | 2.4      | 1.8      |
|                      |                           |                 |                      | 0        | 0        | 0        | 0        | 0.03     | 0.025    | 0.055    | 0.0975   |
|                      |                           |                 |                      | 39       | 149      | 1799     | 5399     | 4099     | 4299     | 5399     | 6999     |
|                      |                           |                 |                      | 0        | 0        | 0        | 6.7333   | 0        | 0        | 0.36     | 3.8933   |
|                      |                           |                 |                      | 1.196    | 0        | 0        | 0.4      | 0.7      | 0.5      | 0.4      | 1.5      |
| NSE                  |                           |                 |                      | 3.9032   | 13.8472  | 163.9    | 492.4343 | 372.9936 | 391.1459 | 491.3754 | 637.4050 |
| F3                   |                           |                 |                      | 79.6054  | 93.2647  | 99.3935  | 99.7973  | 99.7326  | 99.7449  | 99.7969  | 99.8433  |
| CCME                 |                           |                 |                      | 45.2819  | 41.7290  | 38.4441  | 27.1740  | 31.4929  | 31.4869  | 22.4120  | 22.3921  |
| CCME calculator      |                           |                 |                      | 45.3     | 41.7     | 38.4     | 27.2     | 31.5     | 31.5     | 22.4     | 22.4     |

Ca, calcium; CCME, Canadian Council of Ministers of the Environment; TDS, total dissolved solids; Mg, magnesium; NTU, Nephthelene Turbidity unit; WQ, water quality; WQI, water quality index; NSE, normalized sum of excursions.

**Table S3.** Survey questionnaire for Bumbu watershed water quality assessment.

Papua New Guinea University of Technology  
Department of Civil Engineering  
Ph. 473 4371, 473 4624

Dear valued respondent,

Your participation in filling this survey form will provide information necessary for the completion of the research project titled: Bumbu Watershed Water Quality Assessment as a requirement for the Master's Degree in Solid Waste & Resource Management, Department of Civil Engineering at the PNG University of Technology. This survey will assess water use, sources of pollution, hygiene/sanitation, health & community concerns, & other issues in settlement and urban residence around Bumbu Watershed. All the information gathered through this survey will be treated as confidential and used solely for this study; no information will be distributed to third parties. We appreciate your participation.

| Bumbu Water Shed Survey                                                   |                                      | 2020                                                |                                              |                                                                     |
|---------------------------------------------------------------------------|--------------------------------------|-----------------------------------------------------|----------------------------------------------|---------------------------------------------------------------------|
| Date of Interview                                                         | Name Initials                        | Community                                           | Population                                   | LLG/Ward No                                                         |
|                                                                           |                                      |                                                     |                                              |                                                                     |
| <b>Household Demographics</b>                                             |                                      |                                                     |                                              |                                                                     |
| 1. Age                                                                    | <input type="checkbox"/> 18 – 29     | <input type="checkbox"/> 30 – 39                    | <input type="checkbox"/> 40 – 49             | <input type="checkbox"/> 50+                                        |
| 2. Gender                                                                 | <input type="checkbox"/> Male        | <input type="checkbox"/> Female                     |                                              |                                                                     |
| 3. Property                                                               | <input type="checkbox"/> Settlement  | <input type="checkbox"/> Village                    | <input type="checkbox"/> Urban centre        | <input type="checkbox"/> Other                                      |
| 4. Education                                                              | <input type="checkbox"/> Primary     | <input type="checkbox"/> Secondary                  | <input type="checkbox"/> Vocational Training | <input type="checkbox"/> College <input type="checkbox"/> Other     |
| 5. Water Use Practices                                                    | <input type="checkbox"/> Drinking    | <input type="checkbox"/> Washing                    | <input type="checkbox"/> Irrigation          | <input type="checkbox"/> Laundry                                    |
|                                                                           | <input type="checkbox"/> Car wash    | <input type="checkbox"/> Waste disposal             | <input type="checkbox"/> Other               |                                                                     |
| 6. Drinking water source                                                  | <input type="checkbox"/> Piped Water | <input type="checkbox"/> On Spot Water Supply       | <input type="checkbox"/> Rainwater           | <input type="checkbox"/> River Water <input type="checkbox"/> Other |
| 7. Alternative Drinking Water Source. (Specify)                           |                                      |                                                     |                                              |                                                                     |
| 8. Water Treatment method used                                            | <input type="checkbox"/> Boil water  | <input type="checkbox"/> Chlorine or bleach         | <input type="checkbox"/> Both                | <input type="checkbox"/> Other (Specify)                            |
| 9. Do you have a water storage tank?                                      | <input type="checkbox"/> Yes         | <input type="checkbox"/> No                         |                                              |                                                                     |
| 10. Treatment                                                             | <input type="checkbox"/> Yes         | <input type="checkbox"/> No (If Yes please specify) |                                              |                                                                     |
| 11. Time spent inside river (bath, playing etc)?                          | Hours / day                          |                                                     | hours / week                                 |                                                                     |
| 12. Time spent in contact with river water (washing clothes, irrigation)? | Hours / day                          |                                                     | hours / week                                 |                                                                     |

| Hygiene and Sanitation                                                                                                                                                                                                                                                                                                                                |                                        |                                             |                                        |
|-------------------------------------------------------------------------------------------------------------------------------------------------------------------------------------------------------------------------------------------------------------------------------------------------------------------------------------------------------|----------------------------------------|---------------------------------------------|----------------------------------------|
| 11. Do you wash your hands before eating and after using the toilet? <input type="checkbox"/> Yes <input type="checkbox"/> No (If No skip to 13)                                                                                                                                                                                                      |                                        |                                             |                                        |
| 12. When you wash your hands, how often do you use soap?<br><input type="checkbox"/> Always/almost always <input type="checkbox"/> Sometimes <input type="checkbox"/> Never/rarely                                                                                                                                                                    |                                        |                                             |                                        |
| 13. What kind of toilet facility do you use? <input type="checkbox"/> Flush toilet to sewer system <input type="checkbox"/> Flush toilet to septic tank<br><input type="checkbox"/> Pit latrine <input type="checkbox"/> Using the river <input type="checkbox"/> Other (specify)                                                                     |                                        |                                             |                                        |
| 14. If pit latrine, how many people use the latrine on a regular basis?                                                                                                                                                                                                                                                                               |                                        |                                             |                                        |
| 15. How do you dispose of your solid waste?<br><input type="checkbox"/> Collect <input type="checkbox"/> Dump <input type="checkbox"/> Burn <input type="checkbox"/> Compost <input type="checkbox"/> Bury <input type="checkbox"/> Dispose into the river <input type="checkbox"/> Other (please state below)                                        |                                        |                                             |                                        |
| Health and Community Concerns                                                                                                                                                                                                                                                                                                                         |                                        |                                             |                                        |
| 16. How many children under 5 years old live in this household?                                                                                                                                                                                                                                                                                       |                                        |                                             |                                        |
| 17. Has this child/have any of these children had diarrhoea in the past 2 weeks? <input type="checkbox"/> Yes <input type="checkbox"/> No<br>(If NO, skip to 19)                                                                                                                                                                                      |                                        |                                             |                                        |
| 18. Action Taken: <input type="checkbox"/> Taken to the hospital/health centre <input type="checkbox"/> Taken to private clinic <input type="checkbox"/> Purchased medicine <input type="checkbox"/> Home remedy, please specify<br><input type="checkbox"/> No action/illness went away <input type="checkbox"/> Died <input type="checkbox"/> Other |                                        |                                             |                                        |
| 19. Has this child/have these children had any other illness in the past 2 weeks <input type="checkbox"/> Yes <input type="checkbox"/> No<br>If yes, please specify <input type="checkbox"/> Skin infection <input type="checkbox"/> Respiratory infection<br><input type="checkbox"/> Accident/injury <input type="checkbox"/> Other                 |                                        |                                             |                                        |
| Issues in your Community                                                                                                                                                                                                                                                                                                                              |                                        |                                             |                                        |
| 20. Water quality or quantity                                                                                                                                                                                                                                                                                                                         | <input type="checkbox"/> A big problem | <input type="checkbox"/> Somewhat a problem | <input type="checkbox"/> Not a problem |
| 21. Rubbish or pollution                                                                                                                                                                                                                                                                                                                              | <input type="checkbox"/> A big problem | <input type="checkbox"/> Somewhat a problem | <input type="checkbox"/> Not a problem |
| 22. Crime or violence                                                                                                                                                                                                                                                                                                                                 | <input type="checkbox"/> A big problem | <input type="checkbox"/> Somewhat a problem | <input type="checkbox"/> Not a problem |
| 23. Diarrhoea or stomach ailment                                                                                                                                                                                                                                                                                                                      | <input type="checkbox"/> A big problem | <input type="checkbox"/> Somewhat a problem | <input type="checkbox"/> Not a problem |
| 24. Mosquitoes or malaria                                                                                                                                                                                                                                                                                                                             | <input type="checkbox"/> A big problem | <input type="checkbox"/> Somewhat a problem | <input type="checkbox"/> Not a problem |
| 25. Other chronic diseases (diabetes/cancer).                                                                                                                                                                                                                                                                                                         | <input type="checkbox"/> A big problem | <input type="checkbox"/> Somewhat a problem | <input type="checkbox"/> Not a problem |
| 26. HIV/AIDS                                                                                                                                                                                                                                                                                                                                          | <input type="checkbox"/> A big problem | <input type="checkbox"/> Somewhat a problem | <input type="checkbox"/> Not a problem |
| 27. Respiratory illnesses                                                                                                                                                                                                                                                                                                                             | <input type="checkbox"/> A big problem | <input type="checkbox"/> Somewhat a problem | <input type="checkbox"/> Not a problem |
| 28. Skin infection                                                                                                                                                                                                                                                                                                                                    | <input type="checkbox"/> A big problem | <input type="checkbox"/> Somewhat a problem | <input type="checkbox"/> Not a problem |
| 29. Water borne diseases.                                                                                                                                                                                                                                                                                                                             | <input type="checkbox"/> A big problem | <input type="checkbox"/> Somewhat a problem | <input type="checkbox"/> Not a problem |

**Table S4a.** Value scores for 6 household health variables based on 50 community responses in proximity of the 22 water quality sampling stations.

| Locality          | Total participants | ID  | Household health variables |       |       |       |       |        | Mean VS |
|-------------------|--------------------|-----|----------------------------|-------|-------|-------|-------|--------|---------|
|                   |                    |     | VS_DWS                     | VS_TF | VS_WT | VS_WS | VS_WD | VS_WBD |         |
| Bumbu Upstream    | 50                 | UA1 | 0.20                       | 0.30  | 0.00  | 0.10  | 0.40  | 0.80   | 0.30    |
| Trench            | 50                 | UA2 | 0.22                       | 0.33  | 0.00  | 0.14  | 0.36  | 0.52   | 0.26    |
| Bumbu Main        | 50                 | UA3 | 0.23                       | 0.35  | 0.10  | 0.46  | 0.30  | 0.30   | 0.29    |
| CIS Bridge        | 50                 | UA4 | 0.40                       | 0.50  | 0.14  | 0.20  | 0.42  | 0.46   | 0.35    |
| Kamkumu           | 50                 | UA5 | 0.20                       | 0.45  | 0.10  | 0.22  | 0.44  | 0.26   | 0.28    |
| Cassoawary        | 50                 | UA6 | 0.40                       | 0.50  | 0.12  | 0.38  | 0.52  | 0.34   | 0.38    |
| Butibam           | 50                 | UA7 | 0.23                       | 0.45  | 0.08  | 0.44  | 0.50  | 0.24   | 0.32    |
| Downstream        | 50                 | UA8 | 0.40                       | 0.40  | 0.06  | 0.76  | 0.60  | 0.16   | 0.40    |
| Irom              | 50                 | UB1 | 0.10                       | 0.40  | 0.00  | 0.14  | 0.60  | 0.76   | 0.33    |
| Wombong           | 50                 | UB2 | 0.11                       | 0.38  | 0.10  | 0.20  | 0.46  | 0.70   | 0.33    |
| Wonkos            | 50                 | UB3 | 0.22                       | 0.37  | 0.06  | 0.10  | 0.72  | 0.64   | 0.35    |
| Igam Creek        | 50                 | UB4 | 0.42                       | 0.50  | 0.00  | 0.80  | 0.78  | 0.10   | 0.43    |
| Butu Stream       | 50                 | UB5 | 0.36                       | 0.40  | 0.08  | 0.80  | 0.80  | 0.46   | 0.48    |
| Sukos             | 50                 | UB6 | 0.43                       | 0.43  | 0.10  | 0.90  | 0.64  | 0.22   | 0.45    |
| Butibam 1         | 50                 | UB7 | 0.31                       | 0.45  | 0.14  | 0.76  | 0.74  | 0.48   | 0.48    |
| Butibam 2         | 50                 | UB8 | 0.39                       | 0.41  | 0.06  | 0.70  | 0.72  | 0.54   | 0.47    |
| Ambiun1           | 50                 | UC1 | 0.13                       | 0.28  | 0.14  | 0.20  | 0.44  | 0.56   | 0.29    |
| Ambiun 2          | 50                 | UC2 | 0.05                       | 0.28  | 0.10  | 0.00  | 0.66  | 0.12   | 0.20    |
| Wara Rice         | 50                 | UC3 | 0.42                       | 0.40  | 0.06  | 0.28  | 0.56  | 0.30   | 0.34    |
| Wara Misin        | 50                 | UC4 | 0.55                       | 0.33  | 0.10  | 0.06  | 0.90  | 0.10   | 0.34    |
| SopWara           | 50                 | UC5 | 0.66                       | 0.63  | 0.14  | 0.10  | 0.76  | 0.14   | 0.41    |
| Sikambu           | 50                 | UC6 | 0.59                       | 0.60  | 0.18  | 0.14  | 0.80  | 0.24   | 0.43    |
| <b>TOTAL</b>      | 1100               |     |                            |       |       |       |       |        |         |
| <b>Percentage</b> | 1                  |     |                            |       |       |       |       |        |         |

VS\_DWS, value score household drinking water source; VS\_TF, value score household toilet facility; VS\_WT, value score household water treatment; VS\_WS, value score household water storage; VS\_WD, value score household waste disposal; VS\_WBD, value score water borne disease; VS, value score.

**Table S4b.** Green space runoff IV and community overlain on green space.

| Locality       | Total participants | ID  | Community health variables |      |      |       |        |        |         |       |        | Mean |
|----------------|--------------------|-----|----------------------------|------|------|-------|--------|--------|---------|-------|--------|------|
|                |                    |     | VS_WQ                      | VS_P | VS_C | VS_SA | VS_MOS | VS_HIV | VS_COPD | VS_SI | VS_WBD | VS   |
| Bumbu Upstream | 50                 | UA1 | 0.76                       | 0.62 | 0.60 | 0.47  | 0.54   | 0.68   | 0.78    | 0.52  | 0.53   | 0.61 |
| Trench         | 50                 | UA2 | 0.49                       | 0.61 | 0.72 | 0.38  | 0.60   | 0.62   | 0.71    | 0.69  | 0.69   | 0.61 |
| Bumbu Main     | 50                 | UA3 | 0.79                       | 0.60 | 0.76 | 0.41  | 0.61   | 0.68   | 0.50    | 0.62  | 0.51   | 0.61 |
| CIS Bridge     | 50                 | UA4 | 0.52                       | 0.24 | 0.47 | 0.64  | 0.52   | 0.61   | 0.74    | 0.68  | 0.64   | 0.56 |
| Kamkumu        | 50                 | UA5 | 0.20                       | 0.33 | 0.43 | 0.51  | 0.62   | 0.78   | 0.64    | 0.68  | 0.66   | 0.54 |
| Cassoawary     | 50                 | UA6 | 0.48                       | 0.36 | 0.34 | 0.55  | 0.59   | 0.85   | 0.66    | 0.46  | 0.66   | 0.55 |
| Butibam        | 50                 | UA7 | 0.38                       | 0.31 | 0.44 | 0.60  | 0.43   | 0.52   | 0.64    | 0.60  | 0.70   | 0.51 |
| Downstream     | 50                 | UA8 | 0.15                       | 0.05 | 0.15 | 0.08  | 0.31   | 0.64   | 0.30    | 0.18  | 0.17   | 0.23 |
| Irom           | 50                 | UBI | 0.16                       | 0.71 | 0.46 | 0.64  | 0.58   | 0.58   | 0.52    | 0.42  | 0.47   | 0.50 |
| Wombong        | 50                 | UB2 | 0.28                       | 0.45 | 0.80 | 0.64  | 0.58   | 0.66   | 0.67    | 0.67  | 0.54   | 0.59 |
| Wonkos         | 50                 | UB3 | 0.22                       | 0.25 | 0.67 | 0.65  | 0.50   | 0.73   | 0.66    | 0.69  | 0.54   | 0.55 |
| Igam Creek     | 50                 | UB4 | 0.11                       | 0.16 | 0.56 | 0.26  | 0.16   | 0.69   | 0.49    | 0.26  | 0.24   | 0.33 |
| Butu Stream    | 50                 | UB5 | 0.48                       | 0.52 | 0.88 | 0.52  | 0.60   | 0.62   | 0.41    | 0.64  | 0.71   | 0.60 |
| Sukos          | 50                 | UB6 | 0.45                       | 0.45 | 0.90 | 0.54  | 0.57   | 0.77   | 0.51    | 0.46  | 0.61   | 0.58 |
| Butibam 1      | 50                 | UB7 | 0.74                       | 0.59 | 0.52 | 0.65  | 0.50   | 0.78   | 0.62    | 0.77  | 0.50   | 0.63 |
| Butibam 2      | 50                 | UB8 | 0.68                       | 0.70 | 0.57 | 0.70  | 0.51   | 0.70   | 0.62    | 0.69  | 0.49   | 0.63 |
| Ambiun1        | 50                 | UC1 | 0.67                       | 0.65 | 0.70 | 0.75  | 0.56   | 0.63   | 0.55    | 0.60  | 0.62   | 0.64 |
| Ambiun 2       | 50                 | UC2 | 0.24                       | 0.16 | 0.62 | 0.21  | 0.22   | 0.68   | 0.46    | 0.18  | 0.42   | 0.35 |
| Wara Rice      | 50                 | UC3 | 0.65                       | 0.52 | 0.51 | 0.68  | 0.51   | 0.66   | 0.56    | 0.40  | 0.51   | 0.56 |
| Wara Misin     | 50                 | UC4 | 0.35                       | 0.09 | 0.70 | 0.33  | 0.14   | 0.46   | 0.48    | 0.10  | 0.20   | 0.32 |
| SopWara        | 50                 | UC5 | 0.30                       | 0.17 | 0.22 | 0.09  | 0.13   | 0.68   | 0.52    | 0.19  | 0.27   | 0.29 |
| Sikambu        | 50                 | UC6 | 0.26                       | 0.13 | 0.27 | 0.31  | 0.12   | 0.52   | 0.27    | 0.17  | 0.31   | 0.26 |

VS\_WQ, value score water quality; VS\_P, value score community pollution; VS\_C, value score community crime; VS\_SA, value score community stomach ailments; VS\_MOS, value score community mosquito/malaria; VS\_HIV, value score community HIV/AIDS; VS\_COPD, value score community respiratory ailments; VS\_SI, value score community skin illness; VS\_WBD, value score water borne disease; VS, value score.

**Table S5.** Results of forward regression of household health scores versus factors of WQ parameters and runoff of land-use types, evaluated at all 22 sampling stations.

| Model summary household health                    |            |                |                           |                            |        |      |
|---------------------------------------------------|------------|----------------|---------------------------|----------------------------|--------|------|
| Model                                             | R          | R <sup>2</sup> | Adjusted R <sup>2</sup>   | Std. error of the estimate |        |      |
| 1                                                 | 0.694      | 0.482          | 0.456                     | 0.056                      |        |      |
| Predictors: (constant), Factor 3                  |            |                |                           |                            |        |      |
| Coefficients                                      |            |                |                           |                            |        |      |
| Unstandardized coefficients                       |            |                | Standardized coefficients |                            |        |      |
| Model                                             |            | B              | Std. Error                | Beta                       | t      | Sig. |
| 1                                                 | (constant) | 0.36           | 0.012                     |                            | 29.924 | 0    |
|                                                   | Factor 3   | 0.053          | 0.012                     | 0.694                      | 4.312  | 0    |
| Dependent variable: mean vs household health.     |            |                |                           |                            |        |      |
| Sig, significant Std, standard; WQ, water quality |            |                |                           |                            |        |      |

**Table S6.** Results of forward regression of community health scores versus factors of WQ parameters and runoff of land-use types, evaluated at all 22 sampling stations.

| Model summary community health                     |            |                |                           |                            |          |
|----------------------------------------------------|------------|----------------|---------------------------|----------------------------|----------|
| Model                                              | R          | R <sup>2</sup> | Adjusted R <sup>2</sup>   | Std. error of the estimate |          |
| 2                                                  | 0.833      | 0.694          | 0.662                     | 0.079                      |          |
| Predictors: (constant), Factor 5, Factor2          |            |                |                           |                            |          |
| Coefficients                                       |            |                |                           |                            |          |
| Unstandardized coefficients                        |            |                | Standardized coefficients |                            |          |
| Model                                              |            | B              | Std. error                | Beta                       | t Sig.   |
| 2                                                  | (constant) | 0.502          | 0.017                     |                            | 29,721 0 |
|                                                    | Factor 5   | -0.083         | 0.017                     | -0.612                     | -4.823 0 |
|                                                    | Factor 2   | -0.077         | 0.017                     | -0.566                     | -4.459 0 |
| Dependent variable: mean vs community health       |            |                |                           |                            |          |
| Sig, significant Std, standard; WQ, water quality. |            |                |                           |                            |          |

**Table S7.** Results of forward regression of Total Health Scores versus factors of WQ parameters and runoff of land-use types, evaluated at all 22 sampling stations.

| Model summary Total Health                           |            |                |                           |                            |        |       |
|------------------------------------------------------|------------|----------------|---------------------------|----------------------------|--------|-------|
| Model                                                | R          | R <sup>2</sup> | Adjusted R <sup>2</sup>   | Std. error of the estimate |        |       |
| 3                                                    | 0.863      | 0.745          | 0.703                     | 0.047                      |        |       |
| Predictors: (constant), Factor 5, Factor 2, Factor 3 |            |                |                           |                            |        |       |
| Coefficients                                         |            |                |                           |                            |        |       |
| Unstandardized coefficients                          |            |                | Standardized coefficients |                            |        |       |
| Model                                                |            | B              | Std. error                | Beta                       | t      | Sig.  |
| 3                                                    | (constant) | 0.445          | 0.01                      |                            | 44.819 | 0     |
|                                                      | Factor 5   | -0.052         | 0.01                      | -0.609                     | -5.115 | 0     |
|                                                      | Factor 2   | -0.039         | 0.01                      | -0.459                     | -3.861 | 0.001 |
|                                                      | Factor 3   | 0.035          | 0.01                      | 0.404                      | 3.397  | 0.003 |
| Dependent variable: mean vs Total health             |            |                |                           |                            |        |       |
| Sig, significant Std, standard; WQ, water quality.   |            |                |                           |                            |        |       |
